# Supplementary material for: A Genome-Wide Association Study Identifying Single-Nucleotide Polymorphisms for Iron and Zinc Biofortification in a Worldwide Barley Collection
Source: Plants (Basel). 2022 May 19;11(10):1349. doi: 10.3390/plants11101349 (PMC9148054; doi:10.3390/plants11101349)
Supplement: Supplementary file 1 [file plants-11-01349-s001.zip › plants-1651066-Supplement Tables.xlsx]

## Sheet: Table S1
Supplementary Table S1. The list of genotypes used in our study and their corresponding Fe and Zn content values, including descriptive statistics for 2017-2018 and 2018-2019 crop seasons.
					Year 2017-2018	Year 2017-2018	Year 2018-2019	Year 2018-2019
Plot Number/Descriptive statistics	Name/Accession name 1*	Name/Accession name 2	Nature of line	Origin	Fe (mg/kg)	Zn (mg/kg)	Fe (mg/kg)	Zn (mg/kg)
BA 1	C1	Alanda01	Landrace	Algeria	25.772	34.25	28.446	42.285
BA 2	NB-R Parent		Improved line	ICARDA	28.999	32.588	28.182	44.065
BA 3	NB-S Parent		Improved line	ICARDA	24.414	35.392	28.267	45.899
BA 4	Acsad60		Cultivar	Morocco	21.934	29.944	27.88	52.792
BA 5	C4	Carre42	Landrace	Algeria	29.074	29.56	28.482	43.977
BA 6	Acsad68		Cultivar	Morocco	23.464	27.713	30.239	44.642
BA 7	Acsad176		Cultivar	Morocco	26.339	28.566	28.199	41.266
BA 8	Ad RAR		Cultivar	Morocco	21.632	27.968	31.177	49.898
BA 9	C6	Marocaine_Plot_N_280	Landrace	Morocco	26.577	33.477	29.977	52.084
BA 10	Aglou		Cultivar	Morocco	25.383	33.279	31.128	44.789
BA 11	Amalou		Cultivar	Morocco	26.501	21.777	32.45	45.963
BA 12	Amira		Cultivar	Morocco	22.138	35.547	30.304	45.327
BA 13	Annacer		Cultivar	Morocco	24.788	34.07	29.265	41.387
BA 14	ARg8		Cultivar	Morocco	27.928	33.542	30.569	44.728
BA 15	Azilal		Cultivar	Morocco	25.438	26.993	30.149	51.449
BA 16	Firdaws		Cultivar	Morocco	22.369	32.507	28.296	45.133
BA 17	Massine		Cultivar	Morocco	19.75	35.61	30.424	52.77
BA 18	Merzaga		Cultivar	Morocco	25.351	31.986	28.536	56.207
BA 19	Oussama		Cultivar	Morocco	28.726	31.644	28.293	44.47
BA 20	Rabat71		Cultivar	Morocco	19.899	34.339	30.293	53.2
BA 21	C2	Rihane	Landrace	Tunisia	23.622	37.995	30.846	46.625
BA 22	Taffa		Cultivar	Morocco	19.432	28.838	29.41	52.118
BA 23	Tamellalet		Cultivar	Morocco	23.593	29.34
BA 24	Tidas		Cultivar	Morocco	22.396	32.489	27.924	48.731
BA 25	Tissa		Cultivar	Morocco	25.756	35.354	28.567	63.137
BA 26	C5	Djebali	Landrace	Tunisia	20.489	33.817	29.299	47.04
BA 27	Fouara		Landrace	Algeria	19.91	32.122	27.832	52.272
BA 28	Rihane		Landrace	Algeria	25.486	28.195	28.475	53.764
BA 29	Hamra		Landrace	Algeria	23.183	31.767
BA 30	Rihane B		Landrace	ICARDA	26.122	22.86	28.586	44.945
BA 31	Arta		Landrace	ICARDA	27.069	33.243	29.966	45.705
BA 32	Alennda 07		Landrace	ICARDA	21.58	42.035	28.328	53.28
BA 33		RD 2794	Cultivar	India	22.281	36.705
BA 34		PL 419	Cultivar	India	32.521	29.604	26.8	57.851
BA 35		BHS 46	Cultivar	India	23.233	26.91	29.073	48.962
BA 36	C3	Moralis	Cultivar	CIMMYT	21.718	32.277	31.802	49.737
BA 37		MANJULA	Cultivar	India	23.876	31.521	28.555	64.492
BA 38		RD 2592	Cultivar	India	22.629	26.442	27.769	51.154
BA 39		AZAD	Cultivar	India	27.977	34.892	27.31	54.633
BA 40		AMBER	Cultivar	India	22.309	28.076	28.167	51.432
BA 41		PL 426	Cultivar	India	27.985	28.246	27.254	50.998
BA 42		BH 75	Cultivar	India	29.07	34.357	27.814	47.933
BA 43		HBL 316	Cultivar	India	18.23	34.251	27.635	51.196
BA 44		K 551	Cultivar	India	29.235	30.312	27.202	48.05
BA 45		K 409	Cultivar	India	23.744	30.121	28.726	51.376
BA 46		PL 172	Cultivar	India	25.999	28.694	29.489	48.428
BA 47		DWRUB 52	Cultivar	India	26.348	26.804	30.865	63.508
BA 48		KARAN 16	Cultivar	India	31.197	29.123	31.725	60.61
BA 49		RD 2503	Cultivar	India	26.862	21.833	31.955	51.362
BA 50		BHS 380	Cultivar	India	28.976	27.427	28.435	50.795
BA 51		NDB 1173	Cultivar	India	25.413	35.563	29.714	66.031
BA 52		BH 393	Cultivar	India	28.035	27.289	30.774	51.749
BA 53		RANTIT	Cultivar	India	27.362	28.583	27.782	54.676
BA 54		VLB 1	Cultivar	India	26.415	29.966	29.216	55.517
BA 55		RD 2660	Cultivar	India	27.725	25.663	30.785	57.963
BA 56		RD 2794	Cultivar	India	32.194	35.864	27.543	42.521
BA 57		HIMANI	Cultivar	India	32.801	32.44	28.46	44.919
BA 58		RD 2786	Cultivar	India	29.327	31.81	27.266	47.181
BA 59		RAJKIRAN	Cultivar	India	28.471	30.784	29.635	46.115
BA 60		RD 2035	Cultivar	India	29.934	28.419	27.043	53.416
BA 61		VLB 118	Cultivar	India	31.011	23.813	26.541	47.069
BA 62		BCU 73	Cultivar	India	26.157	25.566	30.785	55.823
BA 63		HBL 276	Cultivar	India	26.265	27.881	29.623	61.724
BA 64		BILARA 2	Cultivar	India	30.449	27.141	28.787	49.092
BA 65		K 141	Cultivar	India	28.252	28.831	29.78	47.537
BA 66		DL 88	Cultivar	India	33.873	27.323	27.016	43.81
BA 67		RD 2624	Cultivar	India	28.055	31.567	29.998	65.014
BA 68		RD 2668	Cultivar	India	31.087	32.01	28.906	52.571
BA 69	C5	Djebali	Landrace	Tunisia	26.115	32.348	37.227	62.408
BA 70		K 508	Cultivar	India	34.711	29.016	26.6	47.066
BA 71		DWRUB 64	Cultivar	India	24.463	36.573	30.036	47.089
BA 72		DWR 28	Cultivar	India	31.095	27.679	28.275	54.674
BA 73		K 560	Cultivar	India	29.424	30.517	34.828	50.224
BA 74		KEDAR	Cultivar	India	30.977	26.148	29.414	49.147
BA 75		RD 2552	Cultivar	India	30.31	24.226	28.663	42.548
BA 76		JB 58	Cultivar	India	24.743	20.038	30.167	54.599
BA 77	C3	Moralis	Cultivar	CIMMYT	24.481	33.767	30.458	46.317
BA 78		RD 2052	Cultivar	India	33.329	23.596	27.562	51.618
BA 79		BHS 352	Cultivar	India	25.888	30.369	27.272	49.713
BA 80		HBL 113	Cultivar	India	29.112	26.753	26.736	43.076
BA 81		DWRB 91	Cultivar	India	28.195	29.645	31.848	62.779
BA 82		ALFA 93	Cultivar	India	24.523	27.075	26.366	45.264
BA 83		LAKHAN	Cultivar	India	35.279	20.986	29.219	44.33
BA 84	C6	Marocaine_Plot_N_280	Landrace	Morocco	41.714	19.034	28.416	47.077
BA 85		PL 751	Cultivar	India	30.537	26.63	28.598	42.737
BA 86		DWRB 73	Cultivar	India	29.134	30.862	30.807	59.48
BA 87		JAGRATI	Cultivar	India	40.196	20.417	27.035	46.657
BA 88		JYOTI	Cultivar	India	29.756	28.402	27.93	45.25
BA 89	C4	Carre42	Landrace	Algeria	25.189	32.109	27.145	42.301
BA 90		NB 2	Cultivar	India	29.973	25.757	28.003	43.754
BA 91		K 603	Cultivar	India	29.821	23.468	27.649	58.76
BA 92	Rihane		Landrace	Tunisia	23.263	24.876	28.262	48.006
BA 93	C2	Rihane	Landrace	Tunisia	32.051	23.234	28.737	50.586
BA 94	C1	Alanda01	Landrace	Algeria	30.087	24.902	28.272	46.99
BA 95	C1	Alanda01	Landrace	Algeria	24.409	30.339	29.224	44.751
BA 96		RD 2715	Cultivar	India	30.658	30.371	28.283	69.15
BA 97		BHS 169	Cultivar	India	29.704	24.522	28.399	47.998
BA 98		BH 902	Cultivar	India	39.405	15.14	28.261	51.411
BA 99		GITANJALI	Cultivar	India	28.737	31.176	28.101	49.471
BA 100		NB3	Cultivar	India	32.701	23.602	31.879	46.077
BA 101		RATNA	Cultivar	India	32.405	31.421	29.688	48.807
BA 102		RD 2508	Cultivar	India	33.917	33.319	29.59	46.071
BA 103		UPB 1008	Cultivar	India	27.892	29.932	29.743	64.335
BA 104	C3	Moralis	Cultivar	CIMMYT	30.599	30.739	29.548	44.201
BA 105		DOLMA	Cultivar	India	27.573	29.467	32.761	70.415
BA 106		DWRB 92	Cultivar	India	29.35	30.424	28.395	70.853
BA 107		NB 1	Cultivar	India	25.003	35.582	27.473	58.145
BA 108		HUB 113 (BCU-8017)	Cultivar	India	30.874	30.002	28.195	44.655
BA 109		BHS 400 (BCU-8019)	Cultivar	India	31.005	34.335	25.974	44.4
BA 110		BH 885	Cultivar	India	27.772	35.556	28.861	61.511
BA 111	B5757	EGYPT20	Landrace	CIMMYT	32.861	26.721	28.481	47.394
BA 112	B7991	BATNA	Landrace	CIMMYT	32.462	25.611	38.436	67.047
BA 113	B8469	CItr 11958	Landrace	CIMMYT	31.486	32.154	26.764	50.467
BA 114	B8489	ORGE618	Landrace	CIMMYT	31.778	23.631	27.329	45.041
BA 115	B14038	LAND RACE	Landrace	CIMMYT	26.399	24.062	29.837	45.562
BA 116	CIho455	Caveda	Landrace	Portugal	30.156	23.467	29.246	44.326
BA 117	CIho497	CI 497	Landrace	Egypt	36.683	29.065	27.666	47.937
BA 118	CIho1172	CI 1172	Landrace	Guatemala	29.465	28.537	33.008	57.088
BA 119	CIho1624	Sagia	Landrace	Sudan	29.397	28.138	28.481	45.53
BA 120	CIho2205	Sangatsuko	Landrace	Japan	37.809	20.581	29.916	50.043
BA 121	C2	Rihane	Landrace	Tunisia	36.528	27.42	34.173	51.655
BA 122	CIho2224	CI 2224	Landrace	United States	24.886	25.141	26.941	49.708
BA 123	C5	Djebali	Landrace	Tunisia	32.009	25.868	29.579	47.534
BA 124	C6	Marocaine_Plot_N_280	Landrace	Morocco	24.698	18.994	28.589	53.093
BA 125	CIho2456	Mammoy	Cultivar	Australia	23.86	26.18	28.959	45.413
BA 126	CIho2479	Bongie	Landrace	Algeria	22.771	26.888	29.297	46.326
BA 127	CIho2519	Calif. No. 2336	Landrace	United States	31.837	26.186	30.943	47.263
BA 128	CIho2539	Orzo Filicudi 1921	Landrace	Italy	33.098	24.434	29.645	66.291
BA 129	C4	Carre42	Landrace	Algeria	33.743	22.657	27.745	55.469
BA 130	CIho2543	Orzo Collesano 1921	Landrace	Italy	28.582	19.814	27.184	56.292
BA 131	CIho2547	Orzo Nudo di Altamura 1921	Landrace	Italy	33.259	33.073	26.391	52.64
BA 132	CIho3240	Bahtim	Landrace	Egypt	29.859	31.651	30.429	44.902
BA 133	CIho3387	Carre 42	Landrace	Algeria	33.716	29.764	29.052	46.129
BA 134	CIho3388	Carre 48	Landrace	Algeria	33.604	18.586	28.696	47.818
BA 135	CIho3390	Carre 180	Landrace	Algeria	35.029	17.855	28.819	53.924
BA 136	CIho3549	CI 3549	Landrace	Algeria	30.337	24.85	26.762	51.15
BA 137	CIho3556	Minia	Landrace	Egypt	29.132	23.509	29.453	44.474
BA 138	CIho3581	CI 3581	Landrace	Egypt	27.831	28.086	29.93	52.329
BA 139	CIho3642	CI 3642	Landrace	Egypt	28.7	29.412	27.865	47.448
BA 140	CIho3709	CI 3709	Landrace	Egypt	21.099	17.253	28.697	50.381
BA 141	CIho3734	CI 3734	Landrace	Egypt	30.422	17.097	26.914	51.873
BA 142	CIho4064		Landrace	Mongolia	36.589	26.616	25.481	51.25
BA 143	CIho4069		Landrace	Mongolia	38.796	13.01	28.693	53.397
BA 144	CIho4074		Landrace	Mongolia	27.652	19.874	27.038	67.71
BA 145	CIho4083		Landrace	Mongolia	30.825	18.565	29.916	55.865
BA 146	CIho4087	Nudideficiens	Landrace	Russian Federation	36.771	14.038	26.03	50.87
BA 147	CIho4088	CI 4088	Landrace	Russian Federation	29.617	17.399	28.256	52.352
BA 148	C5	Djebali	Landrace	Tunisia	28.878	19.81	30.17	48.817
BA 149	CIho4144	Kaljou	Landrace	Afghanistan	24.715	11.177	27.988	51.006
BA 150	CIho4176		Landrace	Afghanistan	37.561	19.011	28.97	46.988
BA 151	CIho4264	CI 4264	Landrace	Venezuela	40.69	20.031	28.72	57.238
BA 152	CIho5024	CI 5024	Landrace	India	32.401	26.185	29.883	56.308
BA 153	CIho5057	Malebo	Improved line	Australia	23.605	29.682	32.473	50.521
BA 154	CIho5329	CI 5329	Improved line	United States	26.908	41.082	32.156	66.114
BA 155	C4	Carre42	Landrace	Algeria	26.713	34.243	28.095	51.206
BA 156	CIho5337	CI 5337	Improved line	United States	29.485	33.08	27.391	42.835
BA 157	C3	Moralis	Cultivar	CIMMYT	31.134	35.32	28.937	42.92
BA 158	CIho6020	Success	Cultivar	Australia	26.111	21.225	26.171	55.156
BA 159	CIho6024	Mariout	Cultivar	Australia	33.193	19.941	27.865	47.119
BA 160	CIho6490	Schladener	Cultivar	Germany	35.252	26.05	28.39	40.944
BA 161	CIho6601	Jan	Landrace	Afghanistan	35.923	14.664	28.161	43.003
BA 162	CIho6966	Magdalena	Landrace	Mexico	40.323	14.917	26.956	41.111
BA 163	CIho7491	CI 7491	Landrace	Mexico	32.472	29.23	28.247	43.169
BA 164	CIho7492	CI 7492	Landrace	Mexico	25.753	28.071	29.807	54.433
BA 165	CIho7504	CI 7504	Landrace	Mexico	30.633	35.858	29.339	45.58
BA 166	CIho7791	CI 7791	Landrace	Zimbabwe	32.242	34.41	26.651	42.21
BA 167	CIho11533	San Carlos	Landrace	Argentina	30.317	33.836	25.598	41.59
BA 168	C2	Rihane	Landrace	Tunisia	23.34	26.971	27.956	43.952
BA 169	CIho11582	HOR 1077	Landrace	Turkey	22.764	31.048	26.708	43.106
BA 170	CIho11787	Orge Palestine Nuda	Landrace	Ancient Palestine	26.7	27.324	27.48	49.685
BA 171	CIho13141	CI 13141	Landrace	Ethiopia	31.131	24.989	33.56	70.911
BA 172	C6	Marocaine_Plot_N_280	Landrace	Morocco	34.875	37.301	28.987	53.768
BA 173	CIho13453	CI 13453	Landrace	Romania	32.034	25.684	27.388	69.849
BA 174	CIho13461	CI 13461	Landrace	Romania	32.583	25.327	34.818	60.203
BA 175	CIho13507	CI 13507	Landrace	Romania	32.523	18.776	27.369	59.79
BA 176	CIho13651	H-2127	Landrace	Israel	33.596	26.543	29.357	43.624
BA 177	CIho13824	Atlas 68	Landrace	United States	32.778	24.457	28.148	49.246
BA 178	CIho14051		Landrace	Algeria	30.876	10.428	27.551	47.365
BA 179	CIho14052		Landrace	Algeria	33.804	26.105	27.153	46.672
BA 180	CIho14053		Landrace	Algeria	37.412	18.069	28.148	42.636
BA 181	CIho14059		Landrace	Algeria	33.747	14.256	28.106	46.151
BA 182	CIho14061	Bonfarik	Landrace	Algeria	30.247	18.532	27.813	64.742
BA 183	CIho14085	175	Landrace	Tunisia	31.533	24.082	29.551	53.263
BA 184	CIho14151	3886	Landrace	Mongolia	26.541	22.768	26.723	42.564
BA 185	CIho14216	4041	Landrace	Mongolia	33.498	26.374	26.737	46.645
BA 186	CIho14222	4062	Landrace	Mongolia	32.118	12.93	24.77	46.56
BA 187	CIho14234	4000	Landrace	Mongolia	34.451	19.705	26.861	64.278
BA 188	C1	Alanda01	Landrace	Algeria	33.632	16.54	28.484	41.813
BA 189	C1	Alanda01	Landrace	Algeria	26.344	28.948	27.059	43.067
BA 190	CIho14255	Jou	Landrace	Afghanistan	27.92	29.459	30.198	52.311
BA 191	CIho14286	CI 14286	Landrace	Chile	31.529	24.853	30.865	54.643
BA 192	CIho14287	CI 14287	Landrace	Chile	28.691	26.16	29.822	52.225
BA 193	CIho15279	2528-23	Landrace	Tunisia	33.293	31.717	27.12	43.825
BA 194	CIho15286	Djebali	Landrace	Tunisia	34.112	33.405	29.082	49.816
BA 195	CIho15288	Djebali	Landrace	Tunisia	30.327	38.076	29.567	42.504
BA 196	CIho15291	Djebali	Landrace	Tunisia	33.4	29.174	29.17	57.635
BA 197	CIho15299	Djebali	Landrace	Tunisia	27.375	34.002	28.334	42.806
BA 198	CIho15304	Jebali	Landrace	Tunisia	35.629	27.07	28.976	45.439
BA 199	CIho15309	Jebali	Landrace	Tunisia	28.08	28.966	27.532	46.17
BA 200	C6	Marocaine_Plot_N_280	Landrace	Morocco	24.204	39.79	26.709	41.555
BA 201	CIho15310	Djebali	Landrace	Tunisia	21.8	36.222	27.865	63.65
BA 202	CIho15311	Hmira	Landrace	Tunisia	29.993	30.554	27.049	47.241
BA 203	CIho15313	Djebali	Landrace	Tunisia	25.29	45.058	26.355	54.74
BA 204	CIho15326	2238-83	Landrace	Tunisia	30.38	41.502	26.295	48.252
BA 205	CIho15336	Jebali	Landrace	Tunisia	21.175	50.11	26.732	52.482
BA 206	CIho15339	Djebali	Landrace	Tunisia	28.926	36.899	26.995	47.369
BA 207	CIho15349	Jebali	Landrace	Tunisia	25.833	41.159	27.919	43.075
BA 208	CIho15350	Safra	Landrace	Tunisia	33.618	35.966	26.981	47.029
BA 209	CIho15355	Djebali	Landrace	Tunisia	21.982	42.032	28.909	48.196
BA 210	CIho15362	Jebali	Landrace	Tunisia	27.172	38.366	28.042	45.5
BA 211	CIho15363	Arbi	Landrace	Tunisia	22.877	36.17	29.151	51.188
BA 212	CIho15364	Tounsi	Landrace	Tunisia	24.827	23.545	26.794	52.062
BA 213	CIho15365	Safra	Landrace	Tunisia	26.888	34.517	27.487	47.153
BA 214	CIho15625	CI 15625	Landrace	Unknown	27.806	23.245	30.936	49.354
BA 215	CIho16498	Isogenic: nnlk2lk2vvii	Improved line	United States	20.355	45.468	28.148	52.073
BA 216	PI26179	Barbary	Landrace	Libya	34.568	19.11	30.301	44.89
BA 217	C5	Djebali	Landrace	Tunisia	27.31	33.635	31.672	51.739
BA 218	PI30842	Andie	Landrace	India	28.29	37.886	32.465	53.134
BA 219	PI34314	Kopeck	Landrace	Bolivia	21.437	23.089	28.127	45.077
BA 220	PI38490	Entresole	Landrace	Bolivia	31.28	22.875	27.495	42.403
BA 221	PI39395	Shorthead	Landrace	Australia	27.675	19.585	30.827	46.022
BA 222	PI39397	Barley No. 18	Landrace	Australia	16.928	20.433	30.73	54.091
BA 223	PI39590	Cheliff	Landrace	Algeria	26.247	29.005	26.878	46.609
BA 224	PI39592	Barquis	Landrace	Venezuela	32.557	21.392	28.031	48.747
BA 226	PI48133	California Feed	Landrace	Australia	23.1	37.002	31.194	47.197
BA 227	C4	Carre42	Landrace	Algeria	19.352	49.541	28.666	44.275
BA 228	PI48135	Chilean C	Landrace	Australia	18.284	35.399	30.411	56.8
BA 229	PI48142	Roseworthy Oregon	Cultivar	Australia	23.529	32.978	32.01	54.461
BA 230	PI48143	Sea of Azov	Landrace	Russian Federation	18.687	46.776	28.453	54.511
BA 231	PI49154	Cape	Landrace	Zimbabwe	17.479	16.794	29.095	48.011
BA 232	PI57047		Landrace	Algeria	25.997	15.61
BA 233	PI57048		Landrace	Algeria	24.415	12.409
BA 234	C2	Rihane	Landrace	Tunisia	27.488	26.55	30.32	48.21
BA 235	C3	Moralis	Cultivar	CIMMYT	25.885	19.639	29.331	55.589
BA 236	PI57057		Landrace	Algeria	28.618	30.506	27.804	61.071
BA 237	PI57089	CI 3230	Landrace	China	28.279	29.095	31.309	66.02
BA 238	PI58057		Landrace	Spain	21.571	25.31	26.793	61.233
BA 239	C3	Moralis	Cultivar	CIMMYT	31.536	28.972	33.047	51.734
BA 240	Alanda01		Landrace	Algeria	25.528	14.863	28.067	45.939
BA 241	C2	Rihane	Landrace	Tunisia	26.404	16.016	28.848	48.637
BA 242	PI60663	1921-07	Landrace	Libya	30.944	13.888	29.412	45.153
BA 243	PI60701	Sinai	Landrace	Egypt	18.539	15.441	29.205	50.581
BA 244	PI62358	CI 4268	Landrace	Venezuela	21.267	12.471	25.654	50.111
BA 245	PI64004	Orge Chedret	Landrace	Algeria	27.884	29.104	28.342	47.737
BA 246	PI87180	Mugi	Landrace	Korea. South	29.781	28.791	29.734	48.51
BA 247	PI87765	Hadaka Mugi	Landrace	Korea. South	25.385	38.696	27.897	61.438
BA 248	C5	Djebali	Landrace	Tunisia	32.905	21.908	28.768	52.205
BA 249	PI87780	Hadaka Mugi	Landrace	Korea. North	30.334	27.592	26.535	57.278
BA 250	PI87782	Zairaiyojo	Landrace	Korea. North	25.441	33.614	30.455	59.39
BA 251	PI94875		Landrace	Russian Federation	28.123	27.088	30.716	61.683
BA 252	PI119925	Cebada Paraguay	Landrace	Paraguay	25.77	35.762	36.332	57.586
BA 253	PI129477	Miejscowy z Podkarpacia	Landrace	Poland	30.81	22.868	27.117	57.2
BA 254	PI129491	Nr. 14	Landrace	Tunisia	27.554	21.483	31.655	58.223
BA 255		Moralis	Cultivar	CIMMYT	27.596	30.05	26.196	47.838
BA 256	PI138710		Landrace	Iran	32.171	24.897	28.25	59.681
BA 257	PI140278	CI 6902	Landrace	Afghanistan	25.268	31.258	32.196	51.64
BA 258	PI151795	Abyssinian 21	Landrace	Ethiopia	33.948	28.596	27.128	47.748
BA 259	PI156658		Landrace	Russian Federation	29.381	18.761	28.395	54.048
BA 260	PI157890	Avanguardia	Landrace	Italy	24.897	16.584	28.923	68.348
BA 261	PI157892	Maranini	Landrace	Italy	32.247	40.622	26.161	49.244
BA 262	PI159126	CI 7497	Landrace	Mexico	30.303	17.172	28.066	47.091
BA 263	PI159127	CI 7500	Landrace	Mexico	36.618	24.001	33.716	50.163
BA 264	PI159128	CI 7502	Landrace	Mexico	34.743	17.417	30.66	50.677
BA 265	PI163570	CI 7799	Landrace	Guatemala	33.591	22.452	26.684	60.796
BA 266	C6	Marocaine_Plot_N_280	Landrace	Morocco	34.055	19.281	28.376	58.324
BA 267	PI166078	Lendowa Oowa	Landrace	India	29.919	35.323	24.824	58.755
BA 268	PI174496	Maroccaine 0139	Landrace	Morocco	31.355	22.488	29.798	52.918
BA 269	PI174497	Maroccaine 0187	Landrace	Morocco	27.606	26.733	29.871	65.068
BA 270	PI176004	Oowa	Landrace	India	27.459	29.216	29.524	67.855
BA 271	PI176042	Tsema	Landrace	India	27.989	33.027	33.596	70.212
BA 272	PI176113	Oowajao	Landrace	India	32.403	21.774	34.501	69.689
BA 273	PI176118	Oowajao	Landrace	India	36.062	18.646	28.706	55.342
BA 274	PI178285	Siha	Landrace	Turkey	34.423	19.237	29.943	60.41
BA 275	PI182679	Khashabi	Landrace	Syria	29.095	30.321	27.857	62.36
BA 276	PI182684	Khashabi	Landrace	Syria	37.482	16.511	26.767	45.488
BA 277	PI189768	Orge 4A	Landrace	Tunisia	31.783	26.005	28.826	49.439
BA 278	PI190762	Kobai No. 10	Landrace	Japan	32.177	22.538	28.277	65.302
BA 279	Furat03		Cultivar	CIMMYT	30.406	19.977	28.617	51.592
BA 280	PI194550	Lyallpur 3645	Landrace	Pakistan	27.726	11.017	26.993	57.068
BA 281	C4	Carre42	Landrace	Algeria	21.723	22.684	26.76	54.643
BA 282	C1	Alanda01	Landrace	Algeria	27.807	20.456	25.799	42.232
BA 283	C1	Alanda01	Landrace	Algeria	22.512	15.879	30.584	48.088
BA 284	C5	Djebali	Landrace	Tunisia	18.858	21.143	26.951	47.675
BA 285	PI195318		Landrace	Guatemala	25.212	22.019	24.932	46.164
BA 286	PI195319		Landrace	Guatemala	32.135	17.24	27.616	60.363
BA 287	PI542047	Excel	Landrace	United States. Minnesota	20.348	25.579	26.4	44.827
BA 288	PI202940	Nackt Gerste	Landrace	Sweden	25.51	19.122	37.716	64.443
BA 289	PI205640		Landrace	Ecuador	27.316	18.699	28.065	50.963
BA 290	C6	Marocaine_Plot_N_280	Landrace	Morocco	24.114	23.251	29.471	59.598
BA 291	PI223132	B.M.C.	Landrace	Jordan	18.732	33.127	25.99	44.563
BA 292	PI223134	B-24	Landrace	Jordan	24.884	22.183	27.991	47.741
BA 293	C4	Carre42	Landrace	Algeria	28.362	14.77	28.283	60.82
BA 294	PI223139	F-48	Landrace	Jordan	32.868	14.711	27.236	49.099
BA 295	PI223143	Herawi	Landrace	Jordan	24.148	17.843	27.805	57.543
BA 296	PI223146	Nabawi	Landrace	Jordan	25.18	29.207	26.761	64.905
BA 297	PI225025	Yane Hadaka No. 2	Landrace	Japan	32.026	18.578	28.292	48.678
BA 298	PI226612	Cyprus Black	Landrace	Cyprus	27.469	18.058	28.792	49.941
BA 299	PI226613	Exadjlan	Landrace	Cyprus	23.677	22.925	27.37	47.126
BA 300	PI226614	Paphitico	Landrace	Cyprus	20.394	18.25	38.33	65.179
BA 301	PI244826		Landrace	Pakistan	19.039	31.142	28.346	52.906
BA 302	PI263414	Tichedrett 3265	Landrace	Algeria	29.731	28.208	27.228	48.658
BA 303	PI264204	Tripoli	Landrace	Morocco	21.968	22.288	28.449	55.632
BA 304	PI264205	Sarlis	Landrace	Morocco	20.267	16.04	28.1	60.056
BA 305	PI264210	Wadi Majanin	Landrace	Libya	21.963	19.473	28.525	59.805
BA 306	PI264213	Saida 183	Landrace	Algeria	18.235	20.688	27.332	48.718
BA 307	PI264888		Landrace	Italy	19.034	30.641	27.74	48.027
BA 308	PI264890		Landrace	Italy	28.868	21.556	26.106	48.412
BA 309	PI264891		Landrace	Italy	21.513	17.244	26.005	57.869
BA 310	PI264897		Landrace	Greece	21.528	35.189	26.682	48.586
BA 311	PI264903		Landrace	Greece	28.444	17.694	28.61	43.018
BA 312	PI264904		Landrace	Greece	22.438	21.687	29.952	46.66
BA 313	PI264906		Landrace	Greece	26.373	18.156	27.305	46.023
BA 314	PI268195	Balkan 1942-1120/6	Landrace	Former Yugoslavia	23.518	21.421	27.748	51.952
BA 315	PI270623		Landrace	Peru	20.472	22.583	27.774	48.482
BA 316	C3	Moralis	Cultivar	CIMMYT	25.427	23.697	34.095	54.901
BA 317	PI270645		Landrace	Peru	23.556	14.611	28.989	52.296
BA 318	PI270666		Landrace	Peru	24.572	17.207	30.425	60.393
BA 319	PI270667		Landrace	Peru	23.473	25.51	28.818	61.088
BA 320	PI270683		Landrace	Peru	22.688	26.264	28.192	42.923
BA 321	PI270686		Landrace	Peru	27.419	11.388	29.073	45.334
BA 322	PI270687		Landrace	Peru	30.925	15.857	27.359	63.137
BA 323	PI270692		Landrace	Peru	24.069	15.746	38.233	68.75
BA 324	PI270695		Landrace	Peru	27.142	30.322	28.809	53.519
BA 325	PI270700		Landrace	Peru	22.594	18.137	29.376	51.291
BA 326	PI270702		Landrace	Peru	21.071	22.499	29.929	61.458
BA 327	C2	Rihane	Landrace	Tunisia	26.529	23.748	27.781	50.536
BA 328	PI270708		Landrace	Peru	31.996	17.222	30.177	67.228
BA 329	PI270716		Landrace	Peru	25.144	11.532	26.419	47.404
BA 330	PI270722		Landrace	Peru	29.534	14.569	26.79	45.975
BA 331	PI271250	CN 294	Landrace	India	20.305	31.13	28.76	42.831
BA 332	PI281524	Buck 111	Landrace	Argentina	26.013	14.189	27.145	52.907
BA 333	PI281853	Californian No. 1	Landrace	United States	24.132	24.074	32.956	51.938
BA 334	PI283439	C.P.I. 14139	Landrace	Italy	30.508	14.402	31.991	53.263
BA 335	PI283441	C.P.I. 15700	Landrace	Ethiopia	22.636	15.717	30.3	47.533
BA 336	C3	Moralis	Cultivar	CIMMYT	26.259	27.976	31.13	50.961
BA 337	PI283446	Cyprus Black	Landrace	Cyprus	20.932	28.292	29.703	50.138
BA 338	PI283456	Orge 628	Landrace	Morocco	24.41	20.97	28.748	56.48
BA 339	PI292016	Israeli 46	Landrace	Israel	24.251	14.704	29.162	52.278
BA 340	PI292018	Nissanith	Landrace	Israel	22.359	20.513	31.746	55.757
BA 341	PI294734	Brunneinudum	Landrace	Bulgaria	24.249	21.234	28.694	53.207
BA 342	PI294739	Hindu Kusch	Landrace	Western Asia	23.836	17.493	34.157	67.901
BA 343	PI294743	nudifurcatus	Landrace	Romania	29.447	21.243	27.891	47.794
BA 344	PI295956	BT Hazera 127/1	Landrace	Israel	29.812	19.595	29.282	49.604
BA 345	PI296459	H-2213	Landrace	Eritrea	27.677	24.373	28.904	57.914
BA 346	C2	Rihane	Landrace	Tunisia	23.958	20.503	29.537	46.954
BA 347	PI296460	H-2227	Landrace	Eritrea	19.816	26.135	27.119	52.987
BA 348	PI306469	2724	Landrace	Romania	22.101	17.711	24.979	52.351
BA 349	PI316874	S 7244	Landrace	Ethiopia	28.339	17.243	26.803	64.498
BA 350	PI320213	C.P.I. 28360	Landrace	Australia	38.906	20.509	27.656	49.91
BA 351	PI320216	C.P.I. 28363	Landrace	Australia	29.461	35.137	28.356	47.756
BA 352	PI320217	C.P.I. 28364	Landrace	Australia	31.88	31.914	26.837	52.074
BA 353	PI328388	HOR 671	Landrace	Greece	31.726	27.063	26.901	48.572
BA 354	PI328409	HOR 694	Landrace	Greece	25.923	43.054	28.126	57.246
BA 355	PI328484	HOR 1129	Landrace	Greece	39.625	21.308	27.724	47.062
BA 356	PI328485	HOR 1130	Landrace	Greece	30.611	32.911	26.539	47.754
BA 357	PI328486	HOR 1131	Landrace	Greece	35.227	25.105	27.374	48.171
BA 358	PI328498	HOR 1145	Landrace	Greece	38.692	19.626	28.238	46.717
BA 359	C4	Carre42	Landrace	Algeria	34.668	25.679	28.278	48.302
BA 360	PI328577	HOR 1253	Landrace	Greece	22.914	34.237	28.285	53.563
BA 361	PI328578	HOR 1255	Landrace	Greece	29.924	32.722	29.752	55.42
BA 362	PI328632	HOR 1379	Landrace	Greece	30.555	30.277	29.479	54.357
BA 363	PI328787	HOR 1941	Landrace	Greece	31.857	33.235	33.276	56.62
BA 364	PI328924	HOR 2414	Landrace	Italy	27.665	31.577	27.456	48.293
BA 365	PI328936	Modia	Landrace	Uruguay	29.952	34.861	27.435	62.07
BA 366	PI328945	HOR 2486	Landrace	Italy	32.903	21.585	28.494	53.802
BA 367	PI329042	HOR 1027	Landrace	Greece	32.984	31.07	30.35	62.834
BA 368	PI329043	HOR 1028	Landrace	Greece	31.764	27.076	26.128	54.043
BA 369	PI329114	HOR 2281	Landrace	Greece	31.634	24.812	28.174	49.52
BA 370	PI330513	Coeleste	Landrace	United Kingdom	39.32	21.167	27.246	56.074
BA 371	PI331912	HOR 2003	Landrace	Italy	33.082	25.419	30.456	69.435
BA 372	PI356711	MOR 11/6	Landrace	Morocco	31.062	39.823	28.644	67.371
BA 373	PI356718	MOR 12/5	Landrace	Morocco	40.144	27.528	31.188	58.937
BA 374	C5	Djebali	Landrace	Tunisia	30.115	31.471	28.936	49.188
BA 375	C6	Marocaine_Plot_N_280	Landrace		40.277	26.942	27.902	47.473
BA 376	C1	Alanda01	Landrace	Algeria	19.836	28.392	28.757	56.029
BA 377	C1	Alanda01	Landrace	Algeria	26.641	35.712	34.679	51.772
BA 378	PI356719	MOR 12/6	Landrace	Morocco	31.623	31.149	30.678	52.89
BA 379	C2		Landrace	Tunisia	32.024	25.039	29.127	45.149
BA 380	PI356732	MOR 14/2	Landrace	Morocco	35.039	23.403	28.39	48.143
BA 381	PI356734	MOR 14/4	Landrace	Morocco	33.582	27.323	29.11	47.72
BA 382	C6	Marocaine_Plot_N_280	Landrace	Morocco	32.444	32.397	31.335	59.347
BA 383	PI356737	MOR 14/7	Landrace	Morocco	31.072	29.918	27.377	59.393
BA 384	PI356741	MOR 15/3	Landrace	Morocco	33.49	25.228	29.127	49.732
BA 385	PI356742	MOR 15/4	Landrace	Morocco	33.294	25.971	33.887	62.823
BA 386	PI356759	MOR 17/1	Landrace	Morocco	36.264	27.937	30.271	50.92
BA 387	PI356763	MOR 17/5	Landrace	Morocco	30.095	27.442	31.602	55.835
BA 388	PI356805	WPBS/CAN 3/184	Landrace	Canada	42.327	21.699	32.134	58.499
BA 389	PI371102		Landrace	Switzerland	34.723	27.443	29.518	58.513
BA 390	PI390468	Criolla	Landrace	Ecuador	38.821	19.278	28.757	66.247
BA 391	PI410444	N6	Landrace	Pakistan	44.767	10.414	30.18	58.188
BA 392	PI410456	N24	Landrace	Pakistan	35.289	24.701	28.797	55.407
BA 393	PI410465	N32A	Landrace	Pakistan	40.239	24.573	29.619	55.756
BA 394	PI410475	N40	Landrace	Pakistan	34.806	20.599	29.934	50.713
BA 395	PI410478	N45	Landrace	Pakistan	37.059	22.642	38.878	62.146
BA 396	PI410481	N48	Landrace	Pakistan	36.219	18.28	27.093	55.592
BA 397	PI410483	N50	Landrace	Pakistan	40.632	18.168	33.267	65.25
BA 398	PI410509	N76B	Landrace	Pakistan	34.174	23.223	27.401	50.232
BA 399	PI410520	N89	Landrace	Pakistan	36.659	22.241	38.001	64.961
BA 400	PI410522	N90B	Landrace	Pakistan	32.667	25.875	26.884	59.585
BA 401	PI414082	CHM 70	Landrace	Bolivia	30.601	31.47	30.609	48.546
BA 402	PI414085	Huarisata	Landrace	Bolivia	37.225	22.679	32.864	62.525
BA 403	PI429883	N119	Landrace	India	32.728	23.597	28.839	50.248
BA 404	PI436144		Landrace	Chile	40.007	15.226	27.432	45.152
BA 405	PI436159		Landrace	Chile	34.708	25.227	25.201	54.609
BA 406	PI438585	W-C 2440	Landrace	Guatemala	39.044	14.474	30.007	63.248
BA 407	PI447074	34/22-108	Landrace	Spain	38.663	21.264	30.685	51.624
BA 408	PI447087		Landrace	Spain	34.324	27.208	30.216	55.876
BA 409	PI447100		Landrace	Spain	35.423	26.45	30.015	63.018
BA 410	C3	Moralis	Cultivar	CIMMYT	31.818	41.809	38.233	61.069
BA 411	PI447105		Landrace	Spain	35.133	26.576	27.494	45.714
BA 412	PI447121		Landrace	Spain	33.022	24.7	32.498	58.426
BA 413	PI447133		Landrace	Spain	38.176	22.159	29.22	55.904
BA 414	PI447178		Landrace	Spain	34.53	26.842	29.719	54.026
BA 415	PI447181		Landrace	Spain	36.334	28.226	31.273	55.464
BA 416	PI447191		Landrace	Spain	36.314	16.29	26.574	62.397
BA 417	PI447260		Landrace	Spain	33.278	27.589	28.129	56.244
BA 418	PI452324	STB 32	Landrace	United Kingdom	33.498	28.031	29.737	43.293
BA 419	PI452341	STB 49	Landrace	United Kingdom	33.649	18.735	33.013	52.118
BA 420	C5	Djebali	Landrace	Tunisia	31.338	22.527	32.67	58.141
BA 421	PI452342	STB 50	Landrace	United Kingdom	34.665	25.001	30.722	57.436
BA 422	PI452384	STB 98	Landrace	United Kingdom	37.301	16.327	28.566	64.63
BA 423	C4	Carre42	Landrace	Algeria	28.261	35.4	29.401	50.836
BA 424	PI467366	Comun Hulless	Landrace	Mexico	21.646	25.737	34.992	50.245
BA 425	PI467408	Kamaore 1	Landrace	Japan	26.701	30.787	29.774	58.814
BA 426	PI467654	Kuoreton	Landrace	Finland	24.691	27.653	30.063	61.634
BA 427	C3	Moralis	Cultivar	CIMMYT	22.807	26.425	35.145	59.509
BA 428	PI467690		Landrace	Portugal	25.531	28.848	27.92	58.602
BA 429	PI467691		Landrace	Portugal	23.1	28.184	30.153	63.395
BA 430	PI467692		Landrace	Portugal	33.588	35.437	29.595	63.2
BA 431	PI467739	America	Landrace	Mexico	35.899	34.344	31.642	56.781
BA 432	PI467797	Attiki	Landrace	Greece	20.341	24.266	33.8	61.103
BA 433	PI477781	UNA 8307	Landrace	Peru	35.23	36.861	29.007	48.941
BA 434	PI477792	UNA 8320	Landrace	Peru	28.297	33.182	27.178	57.225
BA 435	PI477836	UNA 8372	Landrace	Peru	29.504	33.393	27.981	46.209
BA 436	PI478431	R-127	Landrace	Bolivia	30.62	35.318	34.551	54.622
BA 437	PI510559	Cebada con Espina	Landrace	Peru	22.672	27.255	27.839	48.696
BA 438	PI513226	Jawo	Landrace	Pakistan	26.233	29.034	38.183	64.041
BA 439	PI548758	HOR 4082	Landrace	Yemen	20.682	24.997	29.619	45.229
BA 440	PI559494	Owa	Landrace	Nepal	24.856	28.375	34.301	60.432
BA 441	PI564503	San Benito 80	Landrace	Bolivia	26.758	30.229	29.249	53.577
BA 442	PI564627	1230-2	Landrace	Pakistan	28.831	27.687	28.256	58.007
BA 443	PI564649	7022	Landrace	Oman	25.771	28.884	27.27	63.674
BA 444	PI572573	JM-3988	Landrace	Israel	22.724	25.815	29.31	43.74
BA 445	PI572604	BHS 254	Landrace	India	19.444	23.534	29.145	59.562
BA 446	PI573760	RNB-3	Landrace	Nepal	29.966	29.722	30.83	63.619
BA 447	PI573786	RNB-29	Landrace	Nepal	28.051	29.209	33.974	50.675
BA 448	PI573802	RNB-45	Landrace	Nepal	29.084	29.953	28.052	60.02
BA 449	PI573864	RNB-118	Landrace	Nepal	28.761	30.414	27.276	51.95
BA 450	PI573985	RNB-244	Landrace	Nepal	30.079	29.002	28.559	53.047
BA 451	C6	Marocaine_Plot_N_280	Landrace	Morocco	32.481	27.559	29.912	47.881
BA 452	PI574003	RNB-264	Landrace	Nepal	26.78	27.38	34.191	52.291
BA 453	PI574089	RNB-373	Landrace	Nepal	32.046	27.413	30.722	56.555
BA 454	PI574091	RNB-376	Landrace	Nepal	34.265	27.299	29.301	59.997
BA 455	C5	Djebali	Landrace	Tunisia	33.508	23.245	29.556	48.8
BA 456	PI574094	RNB-379	Landrace	Nepal	30.021	29.472	28.879	53.213
BA 457	PI584939	Ai Gan Qi	Landrace	China	33.02	26.779	26.483	61.165
BA 458	PI584962	Mi Mai 114	Landrace	China	26.503	26.796	27.615	49.895
BA 459	PI584978	Tian Jin 1 Hao	Landrace	China	30.041	27.94	25.472	55.259
BA 460	PI608763	Washonupana	Landrace	United States	29.191	28.632	29.441	61.229
BA 461	PI610230	Zang Qing 148	Landrace	China	32.246	31.086	33.739	64.71
BA 462	PI610233	Zang Qing 3179	Landrace	China	33.203	29.871	27.287	55.867
BA 463	PI611491	Ai Jiau Or Lin Le Mai	Landrace	China	32.265	31.172	26.729	42.974
BA 464	PI636090	SU 96-7246	Landrace	China	29.679	31.768	25.144	50.194
BA 465	PI636097	Chien 35	Landrace	China	32.286	29.983	27.385	61.792
BA 466	PI639344	TJK03-105	Landrace	Tajikistan	27.839	28.865	33.17	60.116
BA 467	PI639345	TJK03-108	Landrace	Tajikistan	28.75	30.247	27.899	54.871
BA 468	C4	Carre42	Landrace	Algeria	29.846	29.048	30.351	45.14
BA 469	C2	Rihane	Landrace	Tunisia	33.564	32.089	29.917	47.116
BA 470	C1	Alanda01	Landrace	Algeria	22.13	25.821	27.246	40.977
BA 471	C1	Alanda01	Landrace	Algeria	31.625	29.936	29.116	46.492
BA 472	PI639346	TJK03-112	Landrace	Tajikistan	31.406	29.217	27.421	59.757
BA 473	CIho935	Peruvian	Landrace	United States. Minnesota	30.623	27.917	31.513	46.233
BA 474	CIho2291	Childs	Landrace	United States. Verginia	33.089	32.045	33.279	59.383
BA 475	CIho6489	Sudan	Landrace	Portugal. Lisboa	29.059	29.265	26.844	54.049
BA 476	CIho7584	Tenn. Awnless D22-5	Landrace	United States. Tennessee	29.163	30.456	28.281	55.884
BA 477	CIho10968	Dickson	Landrace	United States. North Dakot	26.026	27.961	28.379	56.629
BA 478	CIho11531	ND B112	Landrace	United States. North Dakot	29.627	26.526	29.37	70.904
BA 479	CIho15229	Steptoe	Landrace	United States. Washington	27.84	29.727	38.083	66.381
BA 480	CIho15475	Sutter	Landrace	United States California	27.36	28.743	27.971	52.866
BA 481	CIho15857	Clark	Landrace	United States. Montana	32.93	32.228	29.007	59.245
BA 482	PI28624	Baku	Landrace	Iran	30.163	28.542	27.378	64.649
BA 483	PI36360	Bolivia	Landrace	Bolivia. Oruro	28.097	30.484	29.136	53.925
BA 484	C3	Moralis	Cultivar	CIMMYT	31.681	31.31	35.954	59.371
BA 485	PI58228	Konstantinovka	Landrace	Russia Federation. Primor	31.564	27.793	29.423	53.241
BA 486	PI69426	Tifang	Landrace	China. Heilongjiang	28.903	28.889	28.594	45.267
BA 487	PI83794	Chosen	Landrace	Korea. North. Hamgyong Nam	28.668	30.178	27.742	44.899
BA 488	PI151789	Abyssinian 14	Landrace	Ethiopia	31.411	32.107	36.502	62.04
BA 489	PI193519	Iskandra	Landrace	Ethiopia. Shewa	27.941	27.541	31.695	55.61
BA 490	C5	Djebali	Landrace	Tunisia	28.579	28.479	29.036	43.52
BA 491	PI195985	9839	Landrace	Ethiopia. Welo	29.155	28.957	29.936	45.882
BA 492	PI268187		Landrace	Croatia	24.163	26.21	29.894	44.493
BA 493	PI321779	Cambrinus	Landrace	Netherlands. Groningen	30.57	21.497	28.51	46.545
BA 494	PI321787	Emir	Landrace	Netherlands. South Holland	30.268	27.902	27.904	43.948
BA 495	C6	Marocaine_Plot_N_280	Landrace	Morocco	30.225	30.081	28.833	48.042
BA 496	PI321857	Bigo	Landrace	Netherlands	30.847	29.579	30.462	46.351
BA 497	PI339826	Astrix	Landrace	France. Nord	42.267	24.527	24.379	54.979
BA 498	PI399501	Mazurka	Landrace	Netherlands. Groningen	23.719	24.581	29.132	57.61
BA 499	PI410865	Varunda	Landrace	Netherlands. Gelderland	25.344	24.269	29.916	53.776
BA 500	PI434771	QB 705.1	Landrace	Canada. Quebec	22.729	23.652	31.545	54.51
BA 501	PI467580	Stauffers Obersulzer	Landrace	Germany. Saxony-Anhait	22.926	24.857	28.927	62.807
BA 502	PI468115	Tambar 402	Landrace	United States. Texas	24.355	24.559	27.411	51.062
BA 503	C2	Rihane	Landrace	Tunisia	21.923	23.849	31.24	57.723
BA 504	PI510677	CC XLV	Landrace	United States. Montana	27.327	28.339	31.153	57.508
BA 505	PI531249	Crystal	Landrace	United States. Idaho	22.77	25.065	29.637	63.678
BA 506	PI537576	UC 603	Landrace	United States. California	30.806	18.075	31.187	45.716
BA 507	PI548708	HOR 1428	Landrace	Ethiopia	25.307	19.668	30.436	59.15
BA 508	PI548734	HOR 2926	Landrace	Ethiopia	21.191	23.675	31.726	56.049
BA 509	PI548747	HOR 3209	Landrace	Ethiopia	24.098	26.019	30.992	69.661
BA 510	PI548762	Trumpf	Landrace	Germany. Saxony-Anhait	23.163	28.319	31.238	49.778
BA 511	PI552961	CC XLIII	Landrace	United States. Montana	24.889	26.877	26.356	51.304
BA 512	PI583865	Pamunkey	Landrace	United States. Verginia	23.08	24.514	29.108	50.855
BA 513	PI605474	Bancroft	Landrace	United States. Idaho	23.864	25.394	28.932	59.263
BA 514	C4	Carre42	Landrace	Algeria	23.109	24.634	29.223	55.05
BA 515	PI642787	Giza 2000	Landrace	Egypt. Giza	21.382	23.49	28.623	49.691
BA 516	PI643217	FR926-77	Landrace	United States. North Dakot	26.441	27.878	27.446	48.609
BA 517	PI644104	95SR316A	Landrace	United States. Idaho	22.641	24.315	27.817	58.12
BA 518	GSHO908	Wax1.a	Improved line	Japan	26.156	25.648	30.613	56.024
BA 519	GSHO1314	Rph4.d	Improved line	United States. Colorado	21.248	24.697	29.513	70.521
BA 520	GSHO1318	Rph7.g	Improved line	United States. Colorado	23.771	27.343	28.434	61.052
BA 521	GSHO1588	Rph10.o	Improved line	United States. North Dakot	24.138	25.187	30.458	65.416
BA 522	GSHO1589	Rph11.p	Improved line	United States. North Dakot	22.761	25.134	27.47	55.32
BA 523	GSHO1590	Rph12.z	Improved line	United States. North Dakot	23.799	24.574	28.901	70.663
BA 524	GSHO1597	Rph5.e	Improved line	United States. North Dakot	25.382	26.276	29.57	54.918
BA 525	GSHO 1600	Rph8.h	Improved line	United States. North Dakot	25.355	27.093	30.268	50.642
BA 526	C3	Moralis	Cultivar	CIMMYT	26.746	27.643	30.551	47.69
BA 527	GSHO 1601	Rph9.i	Improved line	United States. North Dakot	23.651	24.804	28.937	44.926
BA 528	GSHO 1632	Ant2.20	Improved line	United States. North Dakot	29.237	26.795	26.68	68.559
BA 529	GSHO 1863	Rph3.c	Improved line	United States. North Dakot	23.404	25.594	31.017	59.376
BA 530	GSHO 1864	Rph3.ac	Improved line	United States. North Dakot	20.152	23.569	28.39	42.022
BA 531	GSHO 1865	Rph5.e	Improved line	United States. North Dakot	26.537	25.978	26.24	50.526
BA 532	GSHO 2323	Rph6.f	Improved line	United States. North Dakot	27.436	28.112	29.873	57.507
BA 533	GSHO 2325	Rph13.x	Improved line	United States. North Dakot	22.898	24.971	29.526	50.354
BA 534	C6	Marocaine_Plot_N_280	Landrace	Morocco	23.889	23.49	34.305	57.885
BA 535	GSHO 2326	Rph14.aa	Improved line	United States. North Dakot	23.831	24.816	28.737	70.85
BA 536	GSHO 2329	Rph3.w	Improved line	United States. North Dakot	25.318	24.551	38.125	63.5
BA 537	GSHO 2330	Rph15.ad	Improved line	United States. North Dakot	25.172	27.454	30.533	70.35
BA 538	cross21		Improved line	UCD	25.362	26.806	30.533	70.35
BA 539	cross4		Improved line	UCD	28.936	18.398	34.491	60.374
BA 540	Mq23		Improved line	UCD	22.948	26.252	32.869	55.713
BA 541	L94		Improved line	UCD	21.973	24.267	30.813	54.886
BA 542	C4	Carre42	Landrace	Algeria	23.303	26.278	31.194	69.993
BA 543	Hyper Sus CB301		Landrace	Unkonwn	25.092	27.439	29.931	53.085
BA 544	BNGT500		Landrace	Tunisia	27.158	24.894	27.686	47.995
BA 545	C5	Djebali	Landrace	Tunisia	17.926	21.319	30.927	47.217
BA 546	BNGT513		Landrace	Tunisia	20.251	23.195	28.427	47.039
BA 547	BNGT515		Landrace	Tunisia	16.192	20.103	28.446	42.745
BA 548	BNGT524		Landrace	Tunisia	22.558	23.494	28.225	46.508
BA 549	BNGT527		Landrace	Tunisia	20.171	23.927	27.647	41.702
BA 550	BNGT528		Landrace	Tunisia	17.433	21.659	29.703	47.779
BA 551	BNGT532		Landrace	Tunisia	16.629	21.242	29.477	42.395
BA 553	BNGT612		Landrace	Tunisia	19.782	22.696	26.667	60.562
BA 554	C2	Rihane	Landrace	Tunisia	20.883	25.22	30.242	58.127
BA 555	BNGT622		Landrace	Tunisia	17.087	19.758	26.358	60.3
BA 556	BNGT625		Landrace	Tunisia	19.543	23.934	27.233	57.917
BA 557	51		Landrace	Tunisia	24.166	24.038	28.176	57.834
BA 558	53		Landrace	Tunisia	16.837	20.485	27.943	43.193
BA 559	54		Landrace	Tunisia	16.548	20.614	25.946	64.66
BA 560	Tombari		Landrace	Tunisia	15.465	19.779	28.611	54.499
BA 561	V26		Landrace	Tunisia	19.161	22.242	30.247	48.064
BA 562	V29		Landrace	Tunisia	18.941	23.688	28.102	49.69
BA 563	Rihane		Landrace	Tunisia	17.969	21.603	29.615	44.542
BA 564	C1	Alanda01	Landrace	Algeria	23.519	26.767	27.915	45.256
Descriptive statistics
Minimun					17.16	5.77	22.54	37.64
Maximun					42.1	46.57	38.72	74.13
Median					28.43	26.56	28.7	52.4
Mean					28.31	26.27	29.09	53.27
Standard deviation (sample)					5.26	6.38	2.36	7.19
* C1 to C6 are checks
Blank cells indicate missing data

## Sheet: Table S2
	Supplement Table S2: SNP associated with iron content in barley grains, and their annotations
Year: 2017-18
Fe_mg_kg_2017_18	Marker	Chromosome	Position in bp	p value	Bonferroni P value			Gen ID	Candidate gene
	JHI-Hv50k-2016-197724	3H	595054022	3.12e-05	0.0013104	0.03584	4.50585	HORVU3Hr1G081540	Transcription initiation factor TFIID subunit 9
	JHI-Hv50k-2016-197775	3H	595221701	8.69e-05	0.0036498	0.03177	4.06098	HORVU3Hr1G081590	undescribed protein
	JHI-Hv50k-2016-457547	7H	32324334	9.78e-05	0.0041076	0.0313	4.00966	HORVU7Hr1G022250	undescribed protein
	JHI-Hv50k-2016-488291	7H	498765300	0.000105	0.00441	0.03103	3.97881	HORVU7Hr1G082900	undescribed protein
	JHI-Hv50k-2016-197572	3H	594730700	0.000127	0.005334	0.03027	3.8962	HORVU3Hr1G081380	U-box domain-containing protein 4
	JHI-Hv50k-2016-197702	3H	594959390	0.00013	0.00546	0.03016	3.88606	HORVU3Hr1G081540	Transcription initiation factor TFIID subunit 9
	JHI-Hv50k-2016-232189	4H	23879683	0.000145	0.00609	0.02975	3.83863	HORVU4Hr1G008700	glutamate decarboxylase
	JHI-Hv50k-2016-78835	2H	53708928	0.000179	0.007518	0.02892	3.74715	HORVU2Hr1G020190	MORC family CW-type zinc finger protein 4
	JHI-Hv50k-2016-197774	3H	595204984	0.000191	0.008022	0.02865	3.71897	HORVU3Hr1G081580	4,5-DOPA dioxygenase extradiol
	JHI-Hv50k-2016-273825	4H	641155435	0.000219	0.009198	0.02813	3.65956	HORVU4Hr1G088840	Post-GPI attachment to proteins factor 3
	BOPA2_12_11499	7H	498937414	0.000237	0.009954	0.02782	3.62525	undescribed	undescribed protein
	JHI-Hv50k-2016-16064	1H	22067619	0.000249	0.010458	0.02761	3.6038	undescribed	undescribed protein
	JHI-Hv50k-2016-488284	7H	498764356	0.00025	0.0105	0.0276	3.60206	HORVU7Hr1G082900	undescribed protein
	JHI-Hv50k-2016-488287	7H	498764737	0.00025	0.0105	0.0276	3.60206	HORVU7Hr1G082900	undescribed protein
	JHI-Hv50k-2016-488282	7H	498764292	0.000267	0.011214	0.02734	3.57349	HORVU7Hr1G082900	undescribed protein
	JHI-Hv50k-2016-488302	7H	498793030	0.000267	0.011214	0.02734	3.57349	HORVU7Hr1G082910	undescribed protein
	SCRI_RS_128285	1H	22176692	0.000278	0.011676	0.0272	3.55596	HORVU1Hr1G009900	Nuclear pore complex protein NUP107
	JHI-Hv50k-2016-42633	1H	514395012	0.000312	0.013104	0.02674	3.50585	HORVU1Hr1G076500	Ribonuclease P protein subunit p29
	JHI-Hv50k-2016-488288	7H	498764799	0.000339	0.014238	0.02642	3.4698	HORVU7Hr1G082900	undescribed protein
	JHI-Hv50k-2016-488292	7H	498765378	0.000339	0.014238	0.02642	3.4698	HORVU7Hr1G082900	undescribed protein
	JHI-Hv50k-2016-197799	3H	595390939	0.000362	0.015204	0.02616	3.44129	HORVU3Hr1G081600	Leucine-rich repeat receptor-like protein kinase family protein
	JHI-Hv50k-2016-273849	4H	641157764	0.000372	0.015624	0.02605	3.42946	HORVU4Hr1G088850	Protein CHAPERONE-LIKE PROTEIN OF POR1, chloroplastic
	JHI-Hv50k-2016-42607	1H	514265808	0.000384	0.016128	0.02593	3.41567	HORVU1Hr1G076480	trehalose phosphate synthase
	JHI-Hv50k-2016-151946	3H	4996348	0.000392	0.016464	0.02585	3.40671	HORVU3Hr1G002280	sucrose phosphate synthase 1F
	JHI-Hv50k-2016-152104	3H	6528475	0.000423	0.017766	0.02555	3.37366	HORVU3Hr1G002540	Dipeptidyl peptidase family member 6
	JHI-Hv50k-2016-488258	7H	498516860	0.000459	0.019278	0.02523	3.33819	HORVU7Hr1G082860	Ribonuclease 3-like protein 3
	JHI-Hv50k-2016-488281	7H	498764210	0.000459	0.019278	0.02523	3.33819	HORVU7Hr1G082900	undescribed protein
	JHI-Hv50k-2016-488290	7H	498765270	0.000459	0.019278	0.02523	3.33819	HORVU7Hr1G082900	undescribed protein
	JHI-Hv50k-2016-488337	7H	498803726	0.000459	0.019278	0.02523	3.33819	HORVU7Hr1G082910	Elongation factor G 1
	JHI-Hv50k-2016-197703	3H	594959864	0.000519	0.021798	0.02476	3.28483	HORVU3Hr1G081540	Transcription initiation factor TFIID subunit 9
	JHI-Hv50k-2016-273786	4H	641153980	0.000554	0.023268	0.0245	3.25649	HORVU4Hr1G088840	Post-GPI attachment to proteins factor 3
	JHI-Hv50k-2016-357548	5H	650754695	0.000554	0.023268	0.02451	3.25649	HORVU5Hr1G117480	Cytidine/deoxycytidylate deaminase family protein
	JHI-Hv50k-2016-197579	3H	594732776	0.000616	0.025872	0.02409	3.21042	HORVU3Hr1G081380	U-box domain-containing protein 4
	JHI-Hv50k-2016-254841	4H	558216785	0.000658	0.027636	0.02384	3.18177	HORVU4Hr1G067270	NAC domain protein,
	JHI-Hv50k-2016-273846	4H	641157608	0.000702	0.029484	0.02359	3.15366	HORVU4Hr1G088850	Protein CHAPERONE-LIKE PROTEIN OF POR1, chloroplastic
	JHI-Hv50k-2016-197652	3H	594940981	0.000732	0.030744	0.02343	3.13549	HORVU3Hr1G081480	Jasmonate O-methyltransferase
	JHI-Hv50k-2016-488279	7H	498764163	0.00076	0.03192	0.02328	3.11919	HORVU7Hr1G082900	undescribed protein
	JHI-Hv50k-2016-488295	7H	498765524	0.00076	0.03192	0.02328	3.11919	HORVU7Hr1G082890	undescribed protein
	JHI-Hv50k-2016-78593	2H	52793645	0.000885	0.03717	0.0227	3.05306	HORVU2Hr1G019970	Auxin-responsive GH3 family protein
	JHI-Hv50k-2016-197804	3H	595391394	0.000944	0.039648	0.02245	3.02503	HORVU3Hr1G081600	Leucine-rich repeat receptor-like protein kinase family protein
	JHI-Hv50k-2016-184105	3H	497570348	0.000958	0.040236	0.02239	3.01863	HORVU3Hr1G065240	Lipid A export ATP-binding/permease protein MsbA
	JHI-Hv50k-2016-184101	3H	497567916	0.000969	0.040698	0.02235	3.01368	HORVU3Hr1G065240	Lipid A export ATP-binding/permease protein MsbA
Year: 2018-19
Fe_mg_kg_2018_19	Marker	Chr	Pos	p		Bonferroni		Gen ID	Candidate gene
	JHI-Hv50k-2016-114559	2H	690696206	0.000198	3.70333	0.00396	0.02925	HORVU2Hr1G100330	nuclear pore complex protein-related
	JHI-Hv50k-2016-260401	4H	598066009	0.000222	3.65365	0.00444	0.0288	HORVU4Hr1G075360	alanine:glyoxylate aminotransferase 2
	JHI-Hv50k-2016-247996	4H	492502136	0.000415	3.38195	0.0083	0.02629	HORVU4Hr1G059010	Acyl-CoA N-acyltransferase with RING/FYVE/PHD-type zinc finger domain
	JHI-Hv50k-2016-114556	2H	690696046	0.000437	3.35952	0.00874	0.02609	HORVU2Hr1G100330	nuclear pore complex protein-related
	JHI-Hv50k-2016-114244	2H	688787136	0.000508	3.29414	0.01016	0.02549	HORVU2Hr1G099960	undescribed protein
	JHI-Hv50k-2016-114548	2H	690572873	0.000521	3.28316	0.01042	0.02538	HORVU2Hr1G100310	26S proteasome non-ATPase regulatory subunit 1 homolog A
	JHI-Hv50k-2016-114549	2H	690573762	0.000521	3.28316	0.01042	0.02538	HORVU2Hr1G100310	26S proteasome non-ATPase regulatory subunit 1 homolog A
	JHI-Hv50k-2016-292154	5H	78261740	0.000535	3.27165	0.0107	0.02528	HORVU5Hr1G018820	CYCLIN A3;4
	JHI-Hv50k-2016-493930	7H	594980185	0.000546	3.26281	0.01092	0.0252	undescribed	undescribed protein
	JHI-Hv50k-2016-493935	7H	594980878	0.000546	3.26281	0.01092	0.0252	undescribed	undescribed protein
	JHI-Hv50k-2016-493939	7H	594981081	0.000546	3.26281	0.01092	0.0252	undescribed	undescribed protein
	SCRI_RS_184126	4H	598987905	0.000586	3.2321	0.01172	0.02492	HORVU4Hr1G075670	Succinate dehydrogenase assembly factor 1A, mitochondrial
	JHI-Hv50k-2016-75273	2H	35714775	0.00061	3.21467	0.0122	0.02476	HORVU2Hr1G015870	Eukaryotic initiation factor 4A
	BOPA2_12_11285	2H	678098934	0.000681	3.16685	0.01362	0.02432	HORVU2Hr1G097200	Bifunctional inhibitor/lipid-transfer protein/seed storage 2S albumin superfamily protein
	JHI-Hv50k-2016-114555	2H	690695852	0.000683	3.16558	0.01366	0.02431	HORVU2Hr1G100330	nuclear pore complex protein-related
	JHI-Hv50k-2016-358385	5H	651947276	0.000693	3.15927	0.01386	0.02425	HORVU5Hr1G118070	undescribed protein
	JHI-Hv50k-2016-105696	2H	644660265	0.000695	3.15802	0.0139	0.02424	HORVU2Hr1G090470	ATP-dependent Clp protease proteolytic subunit
	JHI-Hv50k-2016-33055	1H	438317527	0.000757	3.1209	0.01514	0.0239	HORVU1Hr1G060250	Protein LIGHT-DEPENDENT SHORT HYPOCOTYLS 6
	JHI-Hv50k-2016-16913	1H	29072659	0.000953	3.02091	0.01906	0.02299	HORVU1Hr1G011880	undescribed protein
	JHI-Hv50k-2016-341267	5H	612236647	0.000981	3.00833	0.01962	0.02288	HORVU5Hr1G100910	Inosine-5'-monophosphate dehydrogenase
Year: 2018-19
Fe_mg_kg_2018_19	Marker	Chr	Pos	p	log	Bonferroni	MarkerR2	Gen ID	Candidate gene
	JHI-Hv50k-2016-114559	2H	690696206	0.000198	3.70333	0.00396	0.02925	HORVU2Hr1G100330	nuclear pore complex protein-related
	JHI-Hv50k-2016-260401	4H	598066009	0.000222	3.65365	0.00444	0.0288	HORVU4Hr1G075360	alanine:glyoxylate aminotransferase 2
	JHI-Hv50k-2016-247996	4H	492502136	0.000415	3.38195	0.0083	0.02629	HORVU4Hr1G059010	Acyl-CoA N-acyltransferase with RING/FYVE/PHD-type zinc finger domain
	JHI-Hv50k-2016-114556	2H	690696046	0.000437	3.35952	0.00874	0.02609	HORVU2Hr1G100330	nuclear pore complex protein-related
	JHI-Hv50k-2016-114244	2H	688787136	0.000508	3.29414	0.01016	0.02549	HORVU2Hr1G099960	undescribed protein
	JHI-Hv50k-2016-114548	2H	690572873	0.000521	3.28316	0.01042	0.02538	HORVU2Hr1G100310	26S proteasome non-ATPase regulatory subunit 1 homolog A
	JHI-Hv50k-2016-114549	2H	690573762	0.000521	3.28316	0.01042	0.02538	HORVU2Hr1G100310	26S proteasome non-ATPase regulatory subunit 1 homolog A
	JHI-Hv50k-2016-292154	5H	78261740	0.000535	3.27165	0.0107	0.02528	HORVU5Hr1G018820	CYCLIN A3;4
	JHI-Hv50k-2016-493930	7H	594980185	0.000546	3.26281	0.01092	0.0252		undescribed protein
	JHI-Hv50k-2016-493935	7H	594980878	0.000546	3.26281	0.01092	0.0252		undescribed protein
	JHI-Hv50k-2016-493939	7H	594981081	0.000546	3.26281	0.01092	0.0252		undescribed protein
	SCRI_RS_184126	4H	598987905	0.000586	3.2321	0.01172	0.02492	HORVU4Hr1G075670	Succinate dehydrogenase assembly factor 1A, mitochondrial
	JHI-Hv50k-2016-75273	2H	35714775	0.00061	3.21467	0.0122	0.02476	HORVU2Hr1G015870	Eukaryotic initiation factor 4A
	BOPA2_12_11285	2H	678098934	0.000681	3.16685	0.01362	0.02432	HORVU2Hr1G097200	Bifunctional inhibitor/lipid-transfer protein/seed storage 2S albumin superfamily protein
	JHI-Hv50k-2016-114555	2H	690695852	0.000683	3.16558	0.01366	0.02431	HORVU2Hr1G100330	nuclear pore complex protein-related
	JHI-Hv50k-2016-358385	5H	651947276	0.000693	3.15927	0.01386	0.02425	HORVU5Hr1G118070	undescribed protein
	JHI-Hv50k-2016-105696	2H	644660265	0.000695	3.15802	0.0139	0.02424	HORVU2Hr1G090470	ATP-dependent Clp protease proteolytic subunit
	JHI-Hv50k-2016-33055	1H	438317527	0.000757	3.1209	0.01514	0.0239	HORVU1Hr1G060250	Protein LIGHT-DEPENDENT SHORT HYPOCOTYLS 6
	JHI-Hv50k-2016-16913	1H	29072659	0.000953	3.02091	0.01906	0.02299	HORVU1Hr1G011880	undescribed protein
	JHI-Hv50k-2016-341267	5H	612236647	0.000981	3.00833	0.01962	0.02288	HORVU5Hr1G100910	Inosine-5'-monophosphate dehydrogenase

## Sheet: Table S3
Supplement Table S3: SNP associated with zinc content in barley grains and their annotations
Year 2017-2018
Zn_mg_kg_2017_18	Marker	Chromosome	Position in bp	p value			Bonferroni	Gene ID	Candidate gene
	JHI-Hv50k-2016-198443	3H	598684782	5.4068e-05	0.03426	4.26706	0.00237899	HORVU3Hr1G082300	Protein NRT1/ PTR FAMILY 5.10
	JHI-Hv50k-2016-263938	4H	615385811	5.644e-05	0.03409	4.24841	0.00248336	HORVU4Hr1G080420	Tetratricopeptide repeat protein 7A
	JHI-Hv50k-2016-184521	3H	498961078	6.6521e-05	0.03342	4.17704	0.00292692	HORVU3Hr1G065530	Zinc finger BED domain-containing protein 1
	JHI-Hv50k-2016-184502	3H	498958727	6.8109e-05	0.03332	4.1668	0.0029968	HORVU3Hr1G065530	Zinc finger BED domain-containing protein 1
	JHI-Hv50k-2016-198449	3H	598790707	6.8898e-05	0.03328	4.16179	0.00303151	HORVU3Hr1G082310	5'-3' exoribonuclease 3
	BOPA2_12_30110	1H	374864764	0.00015339	0.03006	3.8142	0.00674916	HORVU1Hr1G050560	Transcription factor MYC2
	JHI-Hv50k-2016-48247	1H	528358590	0.00015839	0.02993	3.80027	0.00696916	HORVU1Hr1G081940	UDP-Glycosyltransferase superfamily protein
	JHI-Hv50k-2016-27089	1H	374659168	0.00016507	0.02976	3.78233	0.00726308	HORVU1Hr1G050550	Retrotransposon protein, putative, unclassified
	JHI-Hv50k-2016-48279	1H	528532202	0.0002688	0.02782	3.57057	0.0118272	HORVU1Hr1G081990	F-box domain containing protein
	JHI-Hv50k-2016-15255	1H	18909673	0.00027523	0.02772	3.5603	0.0121101	HORVU1Hr1G008670	Lysosomal Pro-X carboxypeptidase
	SCRI_RS_182603	1H	15065044	0.00029716	0.02742	3.52701	0.013075	HORVU1Hr1G007420	Cytochrome P450 superfamily protein
	JHI-Hv50k-2016-48499	1H	529192838	0.00030282	0.02734	3.51882	0.0133241	HORVU1Hr1G082270	ROTUNDIFOLIA like 17
	JHI-Hv50k-2016-73615	2H	29316694	0.00033494	0.02694	3.47503	0.0147374	HORVU2Hr1G013500	prephenate dehydratase 1
	JHI-Hv50k-2016-108321	2H	655512523	0.0003435	0.02684	3.46407	0.015114	HORVU2Hr1G092850	Protein kinase superfamily protein
	JHI-Hv50k-2016-74327	2H	31786664	0.00035931	0.02666	3.44453	0.0158096	HORVU2Hr1G014580	eukaryotic translation initiation factor 2 alpha subunit
	JHI-Hv50k-2016-74372	2H	31900365	0.00036364	0.02661	3.43933	0.0160002	HORVU2Hr1G014610	Leucine-rich repeat protein kinase family protein
	SCRI_RS_198601	2H	656022218	0.0003763	0.02648	3.42447	0.0165572	HORVU2Hr1G092980	cationic amino acid transporter 6
	JHI-Hv50k-2016-108431	2H	655814689	0.00038294	0.02641	3.41687	0.0168494	HORVU2Hr1G092900	Trihelix transcription factor
	JHI-Hv50k-2016-125423	2H	717725697	0.00040048	0.02623	3.39742	0.0176211	HORVU2Hr1G109710	TLD-domain containing nucleolar protein
	JHI-Hv50k-2016-127169	2H	721667630	0.0004005	0.02623	3.3974	0.017622	HORVU2Hr1G110940	Chaperone protein DnaJ
	SCRI_RS_182270	2H	31770963	0.0004192	0.02605	3.37758	0.0184448	HORVU2Hr1G014550	undescribed protein
	SCRI_RS_126439	2H	656012726	0.00046675	0.02563	3.33092	0.020537	HORVU2Hr1G092960	RNA binding
	JHI-Hv50k-2016-118390	2H	701962859	0.00049449	0.0254	3.30584	0.0217576	HORVU2Hr1G104090	undescribed protein
	SCRI_RS_165463	2H	656010860	0.00050399	0.02532	3.29758	0.0221756	HORVU2Hr1G092960	RNA binding
	JHI-Hv50k-2016-62012	2H	6179110	0.00050462	0.02532	3.29704	0.0222033	HORVU2Hr1G002700	LIM domain-containing protein
	JHI-Hv50k-2016-184511	3H	498960496	0.00051727	0.02522	3.28628	0.0227599	HORVU3Hr1G065530	Zinc finger BED domain-containing protein 1
	JHI-Hv50k-2016-276209	4H	644990195	0.00055041	0.02497	3.25931	0.024218	HORVU4Hr1G090350	Arsenate reductase 2.2
	JHI-Hv50k-2016-366393	5H	667303306	0.00057034	0.02483	3.24387	0.025095	HORVU5Hr1G124750	Cytokinin riboside 5'-monophosphate phosphoribohydrolase
	JHI-Hv50k-2016-298724	5H	348601805	0.00060729	0.02459	3.2166	0.0267208	HORVU5Hr1G045040	Cytochrome b5
	JHI-Hv50k-2016-400177	6H	374645453	0.00061079	0.02456	3.21411	0.0268748	HORVU6Hr1G057610	undescribed protein
	JHI-Hv50k-2016-421340	6H	554036089	0.00063154	0.02443	3.1996	0.0277878	HORVU6Hr1G084310	sequence-specific DNA binding transcription factors
	JHI-Hv50k-2016-446888	7H	10939372	0.00065973	0.02426	3.18063	0.0290281	HORVU7Hr1G008320	acyl-CoA-binding protein 6
	JHI-Hv50k-2016-488865	7H	508894848	0.00066775	0.02421	3.17539	0.029381	HORVU7Hr1G084500	Cytochrome P450 superfamily protein
	JHI-Hv50k-2016-488773	7H	506707751	0.00076465	0.02368	3.11654	0.0336446	HORVU7Hr1G084140	Serine/threonine-protein kinase
	JHI-Hv50k-2016-488956	7H	511064966	0.00078681	0.02357	3.10413	0.0346196	HORVU7Hr1G084830	Acyl-ACP thioesterase
	JHI-Hv50k-2016-488905	7H	509410359	0.00081079	0.02345	3.09109	0.0356748	HORVU7Hr1G084590	SOUL heme-binding family protein
	SCRI_RS_223732	6H	554913615	0.00081431	0.02343	3.08921	0.0358296	HORVU6Hr1G084530	Zinc finger CCCH-type with G patch domain-containing protein
	JHI-Hv50k-2016-48561	1H	529578266	0.00081772	0.02342	3.0874	0.0359797	HORVU1Hr1G082330	Enoyl-CoA delta isomerase 3
	JHI-Hv50k-2016-48279	1H	528532202	0.00083761	0.02332	3.07696	0.0368548	HORVU1Hr1G081990	F-box domain containing protein
	JHI-Hv50k-2016-360997	5H	656988868	0.00093479	0.02289	3.02929	0.0411308	HORVU5Hr1G120050	undescribed protein
	JHI-Hv50k-2016-217243	3H	673097884	0.00095811	0.0228	3.01858	0.0421568	HORVU3Hr1G107460	Pentatricopeptide repeat-containing protein
	JHI-Hv50k-2016-198465	3H	598828753	0.00098129	0.0227	3.0082	0.0431768	HORVU3Hr1G082340	undescribed protein
	JHI-Hv50k-2016-24851	1H	346194671	0.00099133	0.02266	3.00378	0.0436185	HORVU1Hr1G046990	electron-transfer flavoprotein:ubiquinone oxidoreductase
	JHI-Hv50k-2016-360507	5H	656633554	0.001	0.02262	3	0.044	HORVU5Hr1G119790	carotene isomerase
Year 2018-2019
Zn_mg_kg_2018_19	Marker	Chromosome	Position in bp	p value			Bonferroni P value	Gene ID	Candidate gene
	JHI-Hv50k-2016-232541	4H	26342827	5.6102e-05	0.03419	4.25102	0.00134645	HORVU4Hr1G009290	undescribed protein
	SCRI_RS_115755	3H	664905936	8.2009e-05	0.03265	4.08614	0.00196822	HORVU3Hr1G102520	nascent polypeptide-associated complex subunit alpha-like protein 3
	JHI-Hv50k-2016-44040	1H	518159560	0.00010246	0.03175	3.98945	0.00245904	HORVU1Hr1G077680	Ethylene-responsive transcription factor 1B
	JHI-Hv50k-2016-44085	1H	518229092	0.00010246	0.03175	3.98945	0.00245904	HORVU1Hr1G077710	FAR1-related sequence 5
	JHI-Hv50k-2016-73691	2H	29669343	0.00012464	0.03096	3.90434	0.00299136	HORVU2Hr1G013690	undescribed protein
	JHI-Hv50k-2016-73694	2H	29669609	0.00012464	0.03096	3.90434	0.00299136	HORVU2Hr1G013690	undescribed protein
	JHI-Hv50k-2016-73663	2H	29624393	0.0001632	0.02988	3.78728	0.0039168	HORVU2Hr1G013680	Elongation factor 1-alpha
	JHI-Hv50k-2016-457712	7H	32789580	0.00021847	0.02871	3.66061	0.00524328	HORVU7Hr1G022420	undescribed protein
	JHI-Hv50k-2016-44011	1H	518069835	0.00028173	0.02769	3.55017	0.00676152	HORVU1Hr1G077630	Ubiquitin carboxyl-terminal hydrolase 25
	JHI-Hv50k-2016-215365	3H	667803316	0.00036039	0.02671	3.44323	0.00864936	HORVU3Hr1G105240	BTB/POZ domain-containing protein
	SCRI_RS_213539	1H	518820762	0.00049616	0.02544	3.30438	0.0119078	HORVU1Hr1G077900	Transcription initiation factor IIF, beta subunit
	JHI-Hv50k-2016-195505	3H	583921839	0.00057637	0.02485	3.2393	0.0138329	HORVU3Hr1G079510	undescribed protein
	JHI-Hv50k-2016-492638	7H	589472022	0.00058125	0.02482	3.23564	0.01395	HORVU7Hr1G096760	methyl-CPG-binding domain protein 02
	BOPA1_11832-415	3H	567582668	0.00061842	0.02457	3.20872	0.0148421	HORVU3Hr1G076060	purple acid phosphatase 10
	SCRI_RS_146480	3H	583914027	0.00061902	0.02457	3.2083	0.0148565	HORVU3Hr1G079500	Chromosome 3B, genomic scaffold, cultivar Chinese Spring
	JHI-Hv50k-2016-407276	6H	461870555	0.00065239	0.02436	3.18549	0.0156574	HORVU6Hr1G066740	purine permease 11
	JHI-Hv50k-2016-43487	1H	516785733	0.00065764	0.02433	3.18201	0.0157834	HORVU1Hr1G077230	Cellulose-synthase-like C6
	JHI-Hv50k-2016-457722	7H	32799319	0.00075296	0.02379	3.12323	0.018071	HORVU7Hr1G022420	undescribed protein
	JHI-Hv50k-2016-458089	7H	33043619	0.00089339	0.02312	3.04896	0.0214414	HORVU7Hr1G022570	profilin 2
	JHI-Hv50k-2016-43220	1H	516151499	0.00092713	0.02298	3.03286	0.0222511	HORVU1Hr1G076990	cleavage stimulating factor 64
	JHI-Hv50k-2016-73956	2H	30286453	0.00095181	0.02287	3.02145	0.0228434	HORVU2Hr1G013920	Jasmonate-induced protein, putative
	JHI-Hv50k-2016-232627	4H	27021749	0.00097077	0.0228	3.01288	0.0232985	undescribed protein	undescribed protein
	JHI-Hv50k-2016-232631	4H	27022177	0.00098516	0.02274	3.00649	0.0236438	undescribed protein	undescribed protein
	BOPA1_1270-1263	1H	516309831	0.001	0.02268	3	0.024	HORVU1Hr1G077100	Carbohydrate-binding X8 domain superfamily protein
